# Supplementary material for: Profile of Exosomal and Intracellular microRNA in Gamma-Herpesvirus-Infected Lymphoma Cell Lines
Source: PLoS One. 2016 Sep 9;11(9):e0162574. doi: 10.1371/journal.pone.0162574 (PMC5017767; doi:10.1371/journal.pone.0162574)
Supplement: S3 Table — Ranks are indicated for exosomes and cells. (XLSX) [file pone.0162574.s003.xlsx]

## Sheet: S3Table
S3 Table. Top 20 miRNAs in exosomes of Bjab. Ranks are indicated for exosomes and cells.
ID	Mature sequence	Rank in exosome	Rank in cell
mir-92a-1//mir-92a-2-3p	TATTGCACTTGTCCCGGCCTGT	1	5
mir-181a-2//mir-181a-1-5p	AACATTCAACGCTGTCGGTGAGT	2	3
mir-191-5p	CAACGGAATCCCAAAAGCAGCTG	3	2
mir-182-5p	TTTGGCAATGGTAGAACTCACACT	4	1
mir-146a-5p	TGAGAACTGAATTCCATGGGTT	5	13
mir-423-5p	TGAGGGGCAGAGAGCGAGACTTT	6	23
mir-378a-3p	ACTGGACTTGGAGTCAGAAGGC	7	9
mir-181b-1//mir-181b-2-5p	AACATTCATTGCTGTCGGTGGGT	8	6
mir-10b-5p	TACCCTGTAGAACCGAATTTGTG	9	72
mir-148a-3p	TCAGTGCACTACAGAACTTTGT	10	4
mir-486-1//mir-486-2-5p	TCCTGTACTGAGCTGCCCCGAG	11	26
mir-21-5p	TAGCTTATCAGACTGATGTTGA	12	7
mir-30d-5p	TGTAAACATCCCCGACTGGAAG	13	14
mir-146b-5p	TGAGAACTGAATTCCATAGGCT	14	20
mir-28-3p	CACTAGATTGTGAGCTCCTGGA	15	17
mir-25-3p	CATTGCACTTGTCTCGGTCTGA	16	11
mir-7704-5p	CGGGGTCGGCGGCGACGTG	17	24
mir-16-1//mir-16-2-5p	TAGCAGCACGTAAATATTGGCG	18	12
mir-92a-1-5p	AGGTTGGGATCGGTTGCAATGCT	19	43
mir-423-3p	AGCTCGGTCTGAGGCCCCTCAGT	20	25
